# Supplementary material for: Methyl 10-undecenoate as a raw material for the synthesis of renewable semi-crystalline polyesters and poly(ester-amide)s
Source: Royal Society of Chemistry journal article supplement (doi:10.1039/c2py20394d), 2012-01-01
Supplement: c2py20394d.pdf [file c2py20394d.pdf]

# Supporting Information for

## **Ricin oil as raw material for the synthesis of renewable semi-crystalline polyesters and poly(ester-amide)s**

*Thomas Lebarbé,<sup>a,d</sup> Lise Maisonneuve,<sup>a,b</sup> Thi Hang Nga Nguyen,<sup>a,b</sup> Benoit Gadenne,<sup>c</sup> Carine Alfos,<sup>c</sup> and Henri Cramail<sup>\*a,b</sup>*

<sup>a</sup>Univ. of Bordeaux, Laboratoire de Chimie des Polymères Organiques, UMR 5629, IPB/ENSCBP, 16 avenue Pey-Berland, F-33607, Pessac cedex, France

<sup>b</sup>Centre National de la Recherche Scientifique, Laboratoire de Chimie des Polymères Organiques, UMR 5629, F-33607, Pessac, France, Email : [cramail@enscbp.fr](mailto:cramail@enscbp.fr)

<sup>c</sup>ITERG, 11 rue Gaspard Monge, Parc Industriel, F-33600, Pessac , France.

<sup>d</sup>French Environment and Energy Management Agency, 20 avenue du Grésillé-BP 90406, F-49004, Angers Cedex 01, France

\* Corresponding author: [cramail@enscbp.fr](mailto:cramail@enscbp.fr)

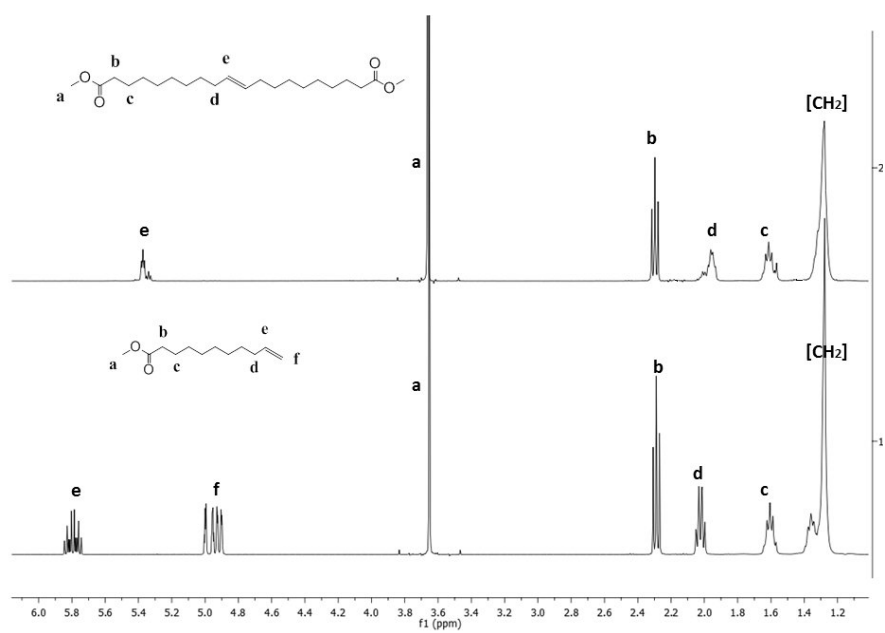

**Figure S1.** Stacked  $^1\text{H-NMR}$  spectra of C20dE based on UndME.
